# Supplementary material for: Disturbed retrieval network and prospective memory decline in postpartum women
Source: PubMed Central journal article supplement (PMC5882973; doi:10.1038/s41598-018-23875-5), 2018-04-03
Supplement: 41598_2018_23875_MOESM1_ESM.pdf [file 41598_2018_23875_MOESM1_ESM.pdf]

**Title:**

Disturbed retrieval network and prospective memory decline in postpartum women

**Authors:**

Na-Young Shin, MD, PhD<sup>1</sup>, Yunjin Bak, MA<sup>1</sup>, Yoonjin Nah, MA<sup>2</sup>, Sanghoon Han PhD<sup>2</sup>,  
Dong Joon Kim, MD, PhD<sup>3</sup>, Se Joo Kim, MD, PhD<sup>4</sup>, Jong Eun Lee, PhD<sup>5</sup>, Sang-Guk Lee,  
MD<sup>6</sup>, Seung-Koo Lee MD, PhD<sup>3\*</sup>

**Affiliations:**

<sup>1</sup>Department of Radiology, College of Medicine, The Catholic University of Korea, Seoul,  
Korea

<sup>2</sup>Department of Psychology, Yonsei University, Seoul, Korea

<sup>3</sup>Department of Radiology, Yonsei University College of Medicine, Seoul, Korea

<sup>4</sup>Department of Psychiatry, Yonsei University College of Medicine, Seoul, Korea

<sup>5</sup>Department of Anatomy, Yonsei University College of Medicine, Seoul, Korea

<sup>6</sup>Department of Laboratory Medicine, Yonsei University College of Medicine, Seoul, Korea

**Correspondence:**

Seung-Koo Lee, MD, PhD

Department of Radiology, Yonsei University College of Medicine

50-1 Yonsei-ro, Seodaemun-gu, Seoul 120-752, Korea

Phone: (+82) 2-2227-2373 Fax: (+82) 2-393-3035

E-mail: [slee@yuhs.ac](mailto:slee@yuhs.ac)

**Supplementary Table 1.** Significant regions for the main effect of the task

| Design        | Contrast                      | Region                                                 | Side                     | MNI coordinates |     |      | Maximum <i>t</i> | No. of voxels | <i>P</i> value |
|---------------|-------------------------------|--------------------------------------------------------|--------------------------|-----------------|-----|------|------------------|---------------|----------------|
|               |                               |                                                        |                          | x               | y   | z    |                  |               |                |
| Block         | PM block > CTRL block         | Inferior parietal lobule                               | left                     | -33             | -55 | 37   | 11.06            | 3341          | < .001         |
|               |                               | Frontal inferior operculum                             | left                     | -48             | 8   | 28   | 9.37             | 3425          | < .001         |
|               |                               | Supplementary motor area/superior medial frontal gyrus | left                     | -3              | 17  | 49   | 8.46             | 555           | < .001         |
|               |                               | Frontal inferior operculum                             | right                    | 42              | 32  | 28   | 8.12             | 1208          | < .001         |
|               |                               | Cerebellum                                             | right                    | 9               | -73 | -32  | 7.55             | 2217          | < .001         |
|               |                               | Inferior temporal gyrus                                | left                     | -45             | -55 | -11  | 5.33             | 35            | < .001         |
|               |                               | Cerebellum                                             | left                     | -21             | -40 | -44  | 4.97             | 6             | < .001         |
|               |                               | PM block < CTRL block                                  | Superior occipital gyrus | right           | 18  | -100 | 16               | 6.62          | 75             |
|               | Middle occipital gyrus        | left                                                   | -15                      | -100            | 13  | 5.88 | 44               | < .001        |                |
| Event-related | PM > PM ongoing               | Middle temporal gyrus                                  | left                     | -54             | -58 | 34   | 8.74             | 362           | < .001         |
|               |                               | Angular gyrus                                          | right                    | 57              | -55 | 37   | 7.21             | 165           | < .001         |
|               |                               | Middle temporal gyrus                                  | left                     | -63             | -25 | -11  | 7                | 200           | < .001         |
|               |                               | Middle temporal gyrus                                  | right                    | 69              | -31 | -11  | 6.94             | 155           | < .001         |
|               |                               | Postcentral gyrus                                      | left                     | -45             | -28 | 61   | 6.58             | 86            | < .001         |
|               |                               | Superiomedial frontal gyrus                            | left                     | -6              | 47  | 25   | 6.21             | 393           | < .001         |
|               |                               | Inferior temporal gyrus                                | left                     | -54             | -1  | -35  | 6.06             | 55            | < .001         |
|               |                               | Orbitoinferior frontal gyrus                           | right                    | 45              | 29  | -14  | 5.38             | 36            | < .001         |
|               |                               | Orbitoinferior frontal gyrus                           | left                     | -48             | 32  | -14  | 5.31             | 62            | < .001         |
|               |                               | Inferior temporal gyrus                                | right                    | 54              | -4  | -35  | 4.91             | 6             | < .001         |
|               | PM < PM ongoing               | Supplementary motor area                               | left                     | -24             | -4  | 52   | 9.1              | 672           | < .001         |
|               |                               | Middle frontal gyrus                                   | right                    | 24              | -1  | 49   | 8.8              | 271           | < .001         |
|               |                               | Lingual gyrus                                          | right                    | 27              | -55 | -8   | 7.07             | 1616          | < .001         |
|               |                               | Superior parietal gyrus                                | right                    | 18              | -70 | 46   | 6.18             | 155           | < .001         |
|               |                               | Vermis                                                 |                          | 0               | -55 | -38  | 6.13             | 67            | < .001         |
|               |                               | Insula                                                 | right                    | 33              | 20  | 7    | 5.88             | 121           | < .001         |
|               |                               | Precentral gyrus                                       | left                     | -57             | 8   | 28   | 5.84             | 95            | < .001         |
|               |                               | Superior parietal gyrus                                | left                     | -15             | -67 | 46   | 5.75             | 75            | < .001         |
|               |                               | Putamen                                                | left                     | -21             | 8   | 1    | 5.55             | 34            | < .001         |
|               |                               | Inferior frontal operculum                             | right                    | 45              | 8   | 28   | 5.41             | 24            | < .001         |
|               |                               | Supramarginal gyrus                                    | right                    | 39              | -40 | 43   | 5.33             | 49            | < .001         |
|               |                               | Cerebellum                                             | left                     | -15             | -55 | -50  | 5.03             | 7             | < .001         |
|               |                               | Middle frontal gyrus                                   | left                     | -39             | 59  | 16   | 4.98             | 10            | < .001         |
|               |                               | Inferior parietal gyrus                                | left                     | -42             | -40 | 43   | 4.97             | 17            | < .001         |
|               | Inferior frontal triangularis | left                                                   | -51                      | 29              | 25  | 4.73 | 9                | < .001        |                |
|               | PM > CTRL ongoing             | Inferior parietal gyrus                                | left                     | -33             | -58 | 40   | 10.33            | 2861          | < .001         |
|               |                               | Inferior frontal operculum                             | right                    | 42              | 29  | 31   | 7.54             | 714           | < .001         |
|               |                               | Orbitomedial frontal gyrus                             | left                     | -45             | 20  | 28   | 7.49             | 2147          | < .001         |
|               |                               | Superior medial frontal gyrus                          |                          | 0               | 38  | 34   | 7.46             | 470           | < .001         |
|               |                               | Cerebellum                                             | right                    | 9               | -76 | -32  | 6.83             | 771           | < .001         |
|               |                               | Inferior temporal gyrus                                | left                     | -63             | -25 | -14  | 5.94             | 170           | < .001         |
|               |                               | Orbitomiddle frontal                                   | right                    | 48              | 38  | -20  | 5.7              | 38            | < .001         |

|                                 |                                                              |       |     |     |     |       |      |        |
|---------------------------------|--------------------------------------------------------------|-------|-----|-----|-----|-------|------|--------|
|                                 | gyrus                                                        |       |     |     |     |       |      |        |
|                                 | Inferior temporal gyrus                                      | right | 63  | -22 | -17 | 5.7   | 131  | < .001 |
|                                 | Caudate                                                      | right | 21  | -1  | 22  | 5.36  | 81   | < .001 |
|                                 | Cerebellum                                                   | left  | -39 | -67 | -35 | 5.35  | 66   | < .001 |
|                                 | Inferior temporal gyrus                                      | left  | -51 | -49 | -14 | 5.26  | 21   | < .001 |
|                                 | Insula                                                       | right | 33  | 23  | -5  | 5.14  | 22   | < .001 |
|                                 | Insula                                                       | left  | -33 | 23  | -5  | 5.06  | 13   | < .001 |
|                                 | Middle frontal gyrus                                         | right | 30  | 56  | 13  | 5.05  | 14   | < .001 |
|                                 | Inferior frontal<br>triangularis                             | right | 54  | 20  | -2  | 4.87  | 27   | < .001 |
|                                 | Vermis                                                       | right | 3   | -58 | -29 | 4.84  | 9    | < .001 |
|                                 | Vermis                                                       |       | 0   | -61 | -17 | 4.7   | 2    | < .001 |
|                                 | Inferior occipital gyrus                                     | left  | -33 | -91 | -11 | 4.63  | 2    | < .001 |
|                                 | Supramarginal gyrus                                          | left  | -60 | -22 | 19  | 4.6   | 3    | < .001 |
| PM < CTRL<br>ongoing            | Rectus gyrus                                                 | left  | -12 | 35  | -17 | 5.3   | 10   | < .001 |
|                                 | Middle occipital gyrus                                       | left  | -18 | -97 | 13  | 5.23  | 29   | < .001 |
|                                 | Superior occipital gyrus                                     | right | 18  | -97 | 16  | 4.62  | 1    | < .001 |
| PM ongoing<br>> CTRL<br>ongoing | Inferior parietal lobule                                     | left  | -30 | -58 | 40  | 12.63 | 7486 | < .001 |
|                                 | Supplementary motor<br>area/superior medial<br>frontal gyrus | left  | -6  | 8   | 55  | 10.7  | 7762 | < .001 |
| PM ongoing<br>< CTRL<br>ongoing | Rectus gyrus                                                 | left  | -12 | 35  | -17 | 5.56  | 79   | < .001 |
|                                 | Superior frontal gyrus                                       | left  | -18 | 41  | 52  | 5.11  | 9    | < .001 |
|                                 | Anterior cingulum                                            | right | 6   | 35  | -8  | 4.71  | 3    | < .001 |

**Supplementary Table 2.** Significant regions for group x task interaction

| Design        | Contrast                                                            | Region                   | Side  | MNI coordinates |     |    | Maximum <i>t</i> | No. of voxels | <i>P</i> value |
|---------------|---------------------------------------------------------------------|--------------------------|-------|-----------------|-----|----|------------------|---------------|----------------|
|               |                                                                     |                          |       | x               | y   | z  |                  |               |                |
| Block         | PP (PM-CTRL) <<br>Control (PM-CTRL)                                 | Superior temporal gyrus  | left  | -57             | -10 | -5 | 3.19             | 69            | .001           |
|               |                                                                     | Hippocampus              | right | 27              | -34 | -8 | 3.13             | 28            | .001           |
|               |                                                                     | Superior temporal gyrus  | right | 63              | -13 | 4  | 2.95             | 25            | .002           |
| Event-related | PP (PM-PM ongoing) ><br>Control (PM-PM ongoing)                     | Supramarginal gyrus      | left  | -42             | -49 | 34 | 3.52             | 74            | < .001         |
|               |                                                                     | Paracentral lobule       | left  | -9              | -22 | 70 | 3.45             | 38            | < .001         |
|               | PP (PM ongoing-CTRL ongoing) <<br>Control (PM ongoing-CTRL ongoing) | Superior parietal lobule | left  | -18             | -49 | 70 | 3.18             | 35            | .001           |
|               |                                                                     | Hippocampus              | right | 27              | -34 | -5 | 3.1              | 26            | .001           |

Note.- PP, postpartum group.

**Supplementary Table 3.** Significant group x task interaction regions for PPI analysis

| Contrast                                                         | Region                        | Side  | MNI coordinates |     |     | Maximum t | No. of voxels | P value |
|------------------------------------------------------------------|-------------------------------|-------|-----------------|-----|-----|-----------|---------------|---------|
|                                                                  |                               |       | x               | y   | z   |           |               |         |
| PP (PM-PM ongoing) < Control (PM-PM ongoing)                     | Superior occipital gyrus      | left  | -36             | -97 | 16  | 4.47      | 369           | < .001  |
|                                                                  | Superior medial frontal gyrus |       | 0               | 59  | -11 | 4.41      | 582           | < .001  |
|                                                                  | Superior temporal gyrus       | right | 45              | -64 | 25  | 4.02      | 172           | < .001  |
|                                                                  | Cerebellum                    | left  | -12             | -73 | -35 | 3.52      | 115           | < .001  |
|                                                                  | Precuneus                     | right | 9               | -52 | 16  | 3.50      | 120           | < .001  |
|                                                                  | Hippocampus                   | right | 21              | -22 | -8  | 3.41      | 56            | < .001  |
|                                                                  | Inferior parietal lobule      | right | 30              | -40 | 52  | 3.40      | 96            | < .001  |
|                                                                  | Fusiform gyrus                | right | 36              | -46 | -14 | 3.32      | 28            | .001    |
|                                                                  | Cerebellum                    | left  | -48             | -61 | -47 | 3.30      | 34            | .001    |
|                                                                  | Cerebellum                    | left  | -18             | -79 | -17 | 3.23      | 78            | .001    |
|                                                                  | Middle occipital gyrus        | right | 27              | -88 | 34  | 3.07      | 45            | .001    |
| PP (PM-CTRL ongoing) < Control (PM-CTRL ongoing)                 | Middle occipital gyrus        | left  | -48             | -85 | 16  | 3.99      | 472           | < .001  |
|                                                                  | Middle temporal pole          | left  | -30             | 5   | -38 | 3.77      | 51            | < .001  |
|                                                                  | Middle frontal gyrus          | right | 48              | -7  | 58  | 3.54      | 40            | < .001  |
|                                                                  | Vernis                        |       | 0               | -58 | -50 | 3.39      | 40            | < .001  |
|                                                                  | Lingual gyrus                 | right | 15              | -58 | -2  | 3.29      | 77            | .001    |
|                                                                  | Inferior temporal gyrus       | left  | -51             | -1  | -32 | 3.17      | 30            | .001    |
|                                                                  | Superior frontal gyrus        | right | 24              | -13 | 67  | 3.04      | 27            | .001    |
|                                                                  | Middle temporal gyrus         | right | 51              | -67 | 16  | 2.98      | 29            | .002    |
| PP (PM ongoing-CTRL ongoing) > Control (PM ongoing-CTRL ongoing) | Rectus gyrus                  | left  | -3              | 53  | -23 | 3.33      | 42            | .001    |

Note.- PP, postpartum group.

**Supplementary Table 4.** Effect of predictors (serum level of estradiol, BDI score, and number of nocturnal awakenings) on PM accuracy through a mediator (FC\_PM>PM ongoing) after controlling for age and duration of education.

|                      | FC_PM>PM ongoing |      |                | PM accuracy |      |                |
|----------------------|------------------|------|----------------|-------------|------|----------------|
|                      | $\beta$          | SE   | <i>P</i> value | $\beta$     | SE   | <i>P</i> value |
| Estradiol (pg/mL)    | .006             | .002 | .004           | .001        | .001 | .444           |
| BDI score            | .048             | .040 | .228           | .035        | .021 | .094           |
| Number of awakenings | -.147            | .213 | .490           | -.429       | .110 | < .001         |
| FC_PM>PM ongoing     |                  |      |                | .191        | .081 | .018           |

Note.-  $\beta$ , beta coefficient, FC\_PM>PM ongoing, functional connectivity between the right hippocampus and retrieval-related ventral fronto-parietal network in PM trials compared to PM ongoing trials; SE, standard error
